# Supplementary material for: Correlation between Antimicrobial Activity Values and Total Phenolic Content/Antioxidant Activity in Rubus idaeus L.
Source: MDPI journal article supplement (doi:10.3390/plants13040504), 2024-02-11

## SUPPLEMENT 1

### Scheme I. Antioxidant activity (DPPH, ABTS, FRAP), total phenolic content (TPC) and HPLC analysis process and methods

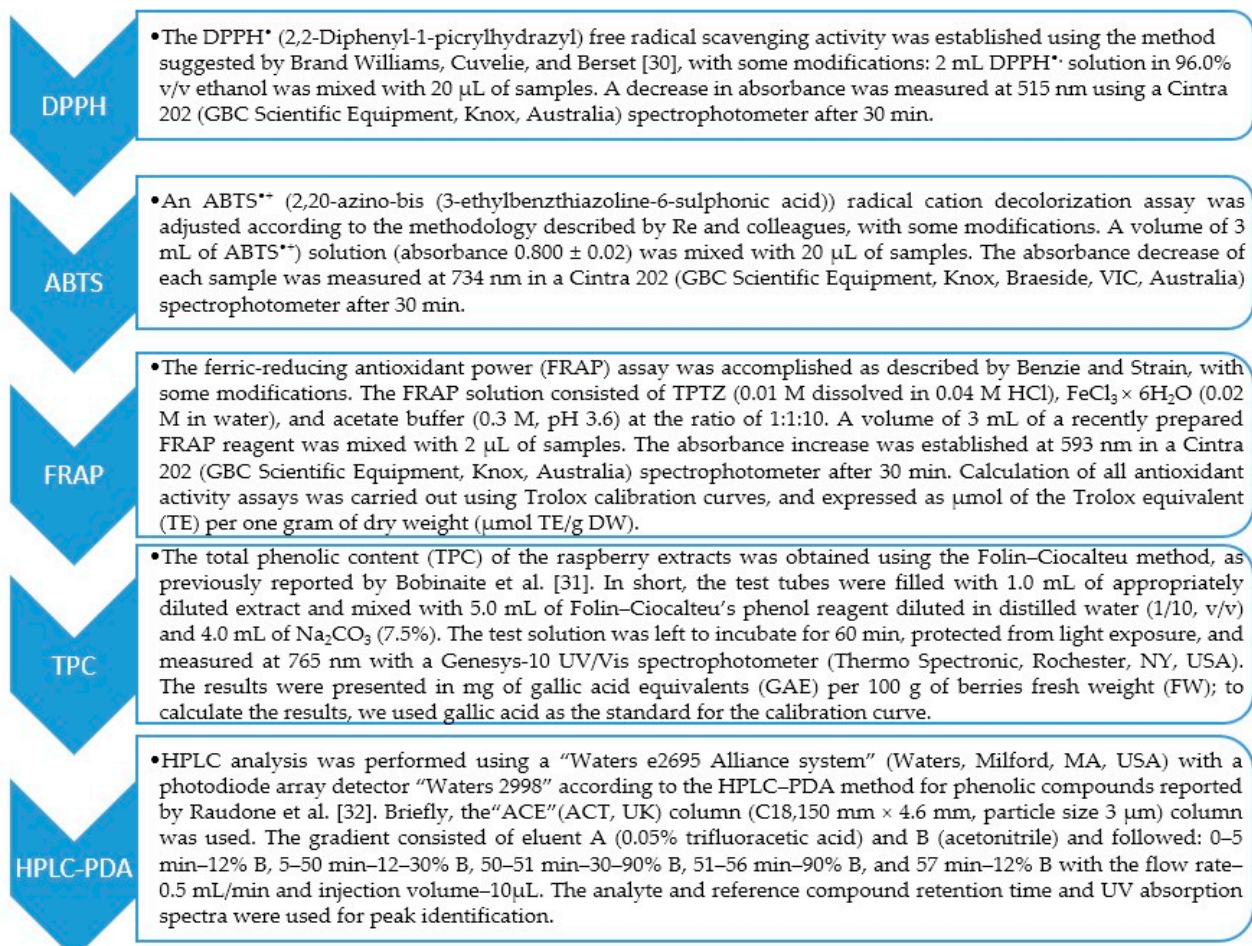

Supplement: s1 [file s1]
